# Supplementary material
Source: PubMed Central journal article supplement (PMC3772389)
Supplement: supp_126.18.4173_JCS126102.pdf [file supp_126.18.4173_JCS126102.pdf]

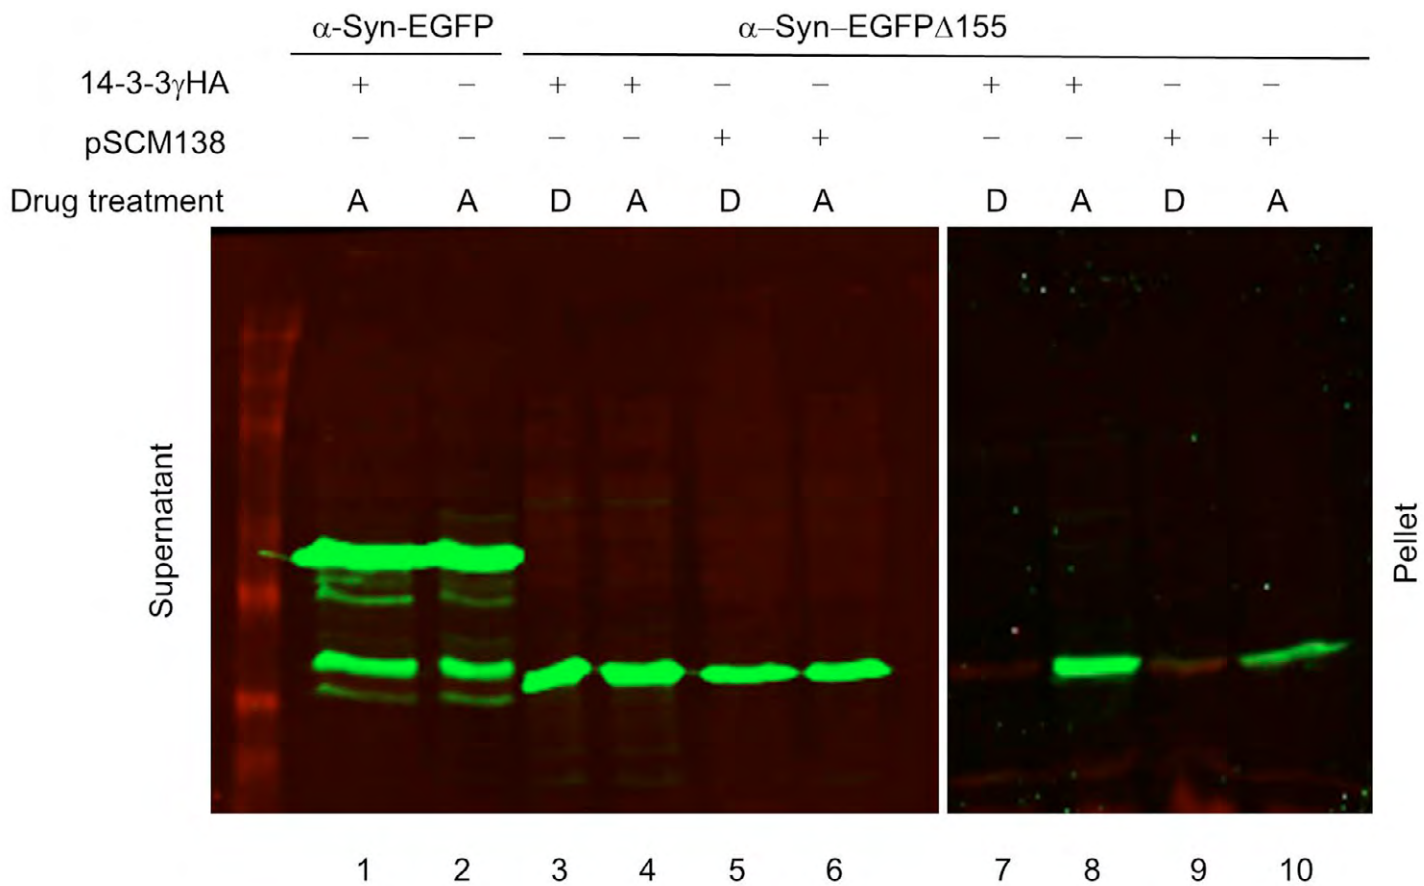

**Fig. S1. 14-3-3 enhances the accumulation of  $\alpha$ -Syn-EGFP $\Delta$ 155 in the insoluble fraction.**  $\alpha$ -SynEGFP $\Delta$ 155 was transfected into tsA201 cells together with either 14-3-3 $\gamma$ HA or pSCM138. Followed by a treatment of either ALLN (**A**) or DMSO (**D**) for 24 hs, whole cell lysates were separated into Triton-X100 soluble (supernatant) and insoluble (pellet) fractions, and samples from both fractions were analyzed by western blotting with an anti- $\alpha$ -Syn antibody (lanes 3-10). Lysates of cells transfected with the full-length  $\alpha$ -SynEGFP were shown in lanes 1 and 2. Raw Odyssey Images are shown to depict the Benchmark<sup>TM</sup> protein ladder (left lane).

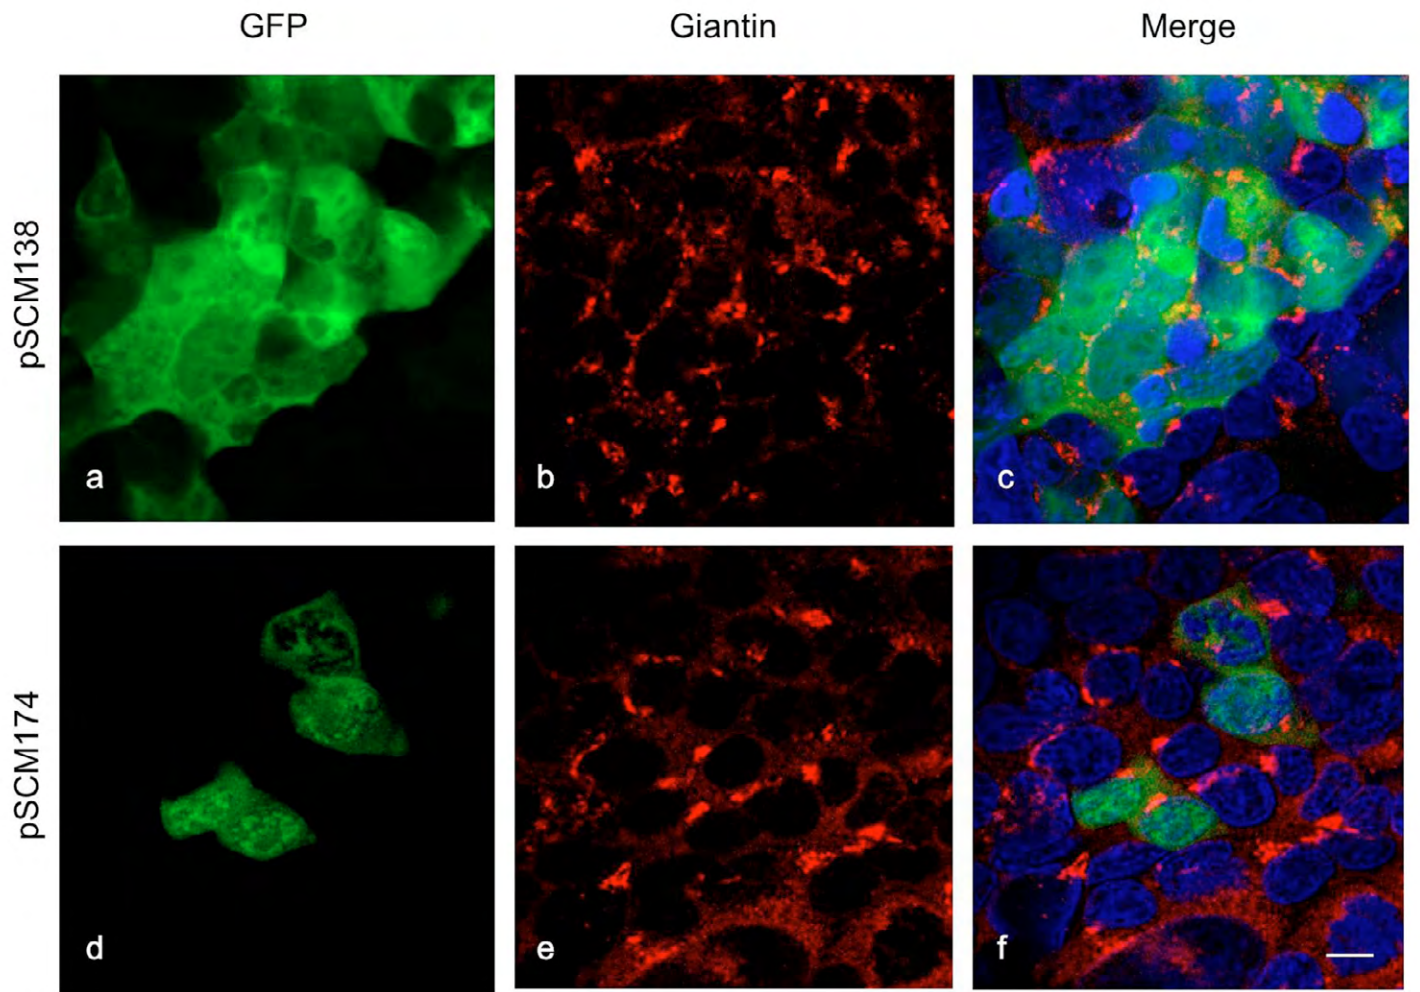

**Fig. S2. Golgi positioning is not affected by 14-3-3 inhibition.** Representative confocal images of CHO cells transfected with either the 14-3-3 binding antagonist pSCM138 (a) or its inactive control, pSCM174 (d). Cells were immunostained with Giantin antibodies to visualize Golgi apparatus (b and e; red), Golgi organization in pSCM138-transfected cells is similar to that in pSCM174-transfected or non-transfected cells. Scale bar, 10  $\mu$ m.
